# Supplementary material for: Location-controlled parallel and vertical orientation by dewetting-induced block copolymer directed self-assembly
Source: Royal Society of Chemistry journal article supplement (doi:10.1039/c3tc30278d), 2013-01-01
Supplement: c3tc30278d.pdf [file c3tc30278d.pdf]

## **Supporting information**

### **Location-Controlled Parallel and Vertical Orientation by Dewetting-Induced Block Copolymer Directed Self-Assembly**

**Haeng-Deog Koh, Youn-Jung Park, Seong-Jun Jeong, Young-Nam Kwon, In Taek Han,  
Mi-Jeong Kim\***

Samsung Advanced Institute of Technology (SAIT), Mt. 14-1, Nongseo-dong, Giheung-gu,  
Yongin-si, Gyeonggi-do 446-712, Republic of Korea.

\*Corresponding Author

Dr. Mi-Jeong Kim

Tel: +82-31-280-8323, Fax: +82-31-280-6739

Email: [mj09.kim@samsung.com](mailto:mj09.kim@samsung.com)

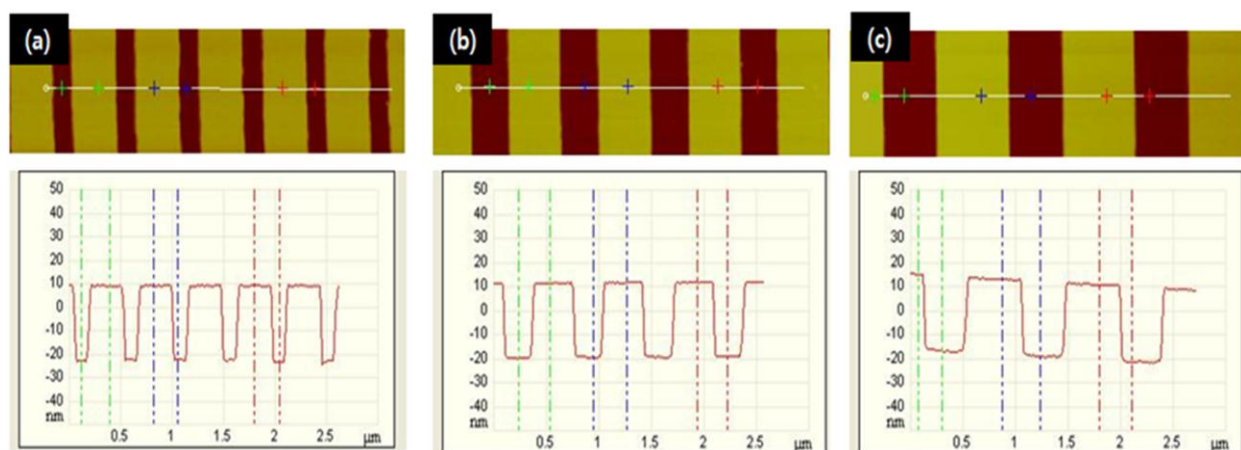

**Figure S1.** Si Trenches with different widths of (a) 180 nm with 31.6 nm height, (b) 280 nm with 30.8 nm height, and (c) 380 nm with 31.9 nm height.

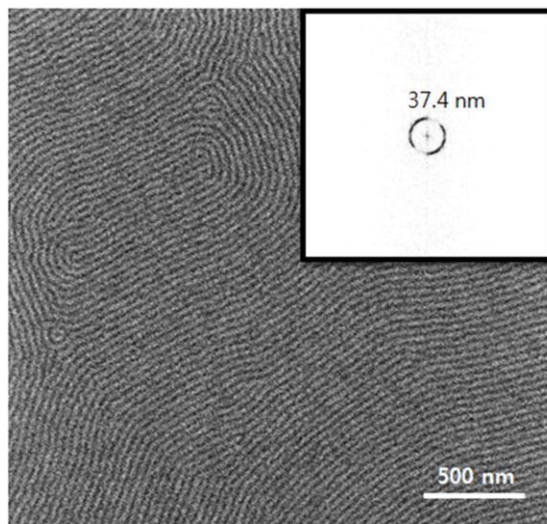

**Figure S2.** PS-*b*-PMMA half-cylinder arrays on Si bare wafer with 37.4 nm period.

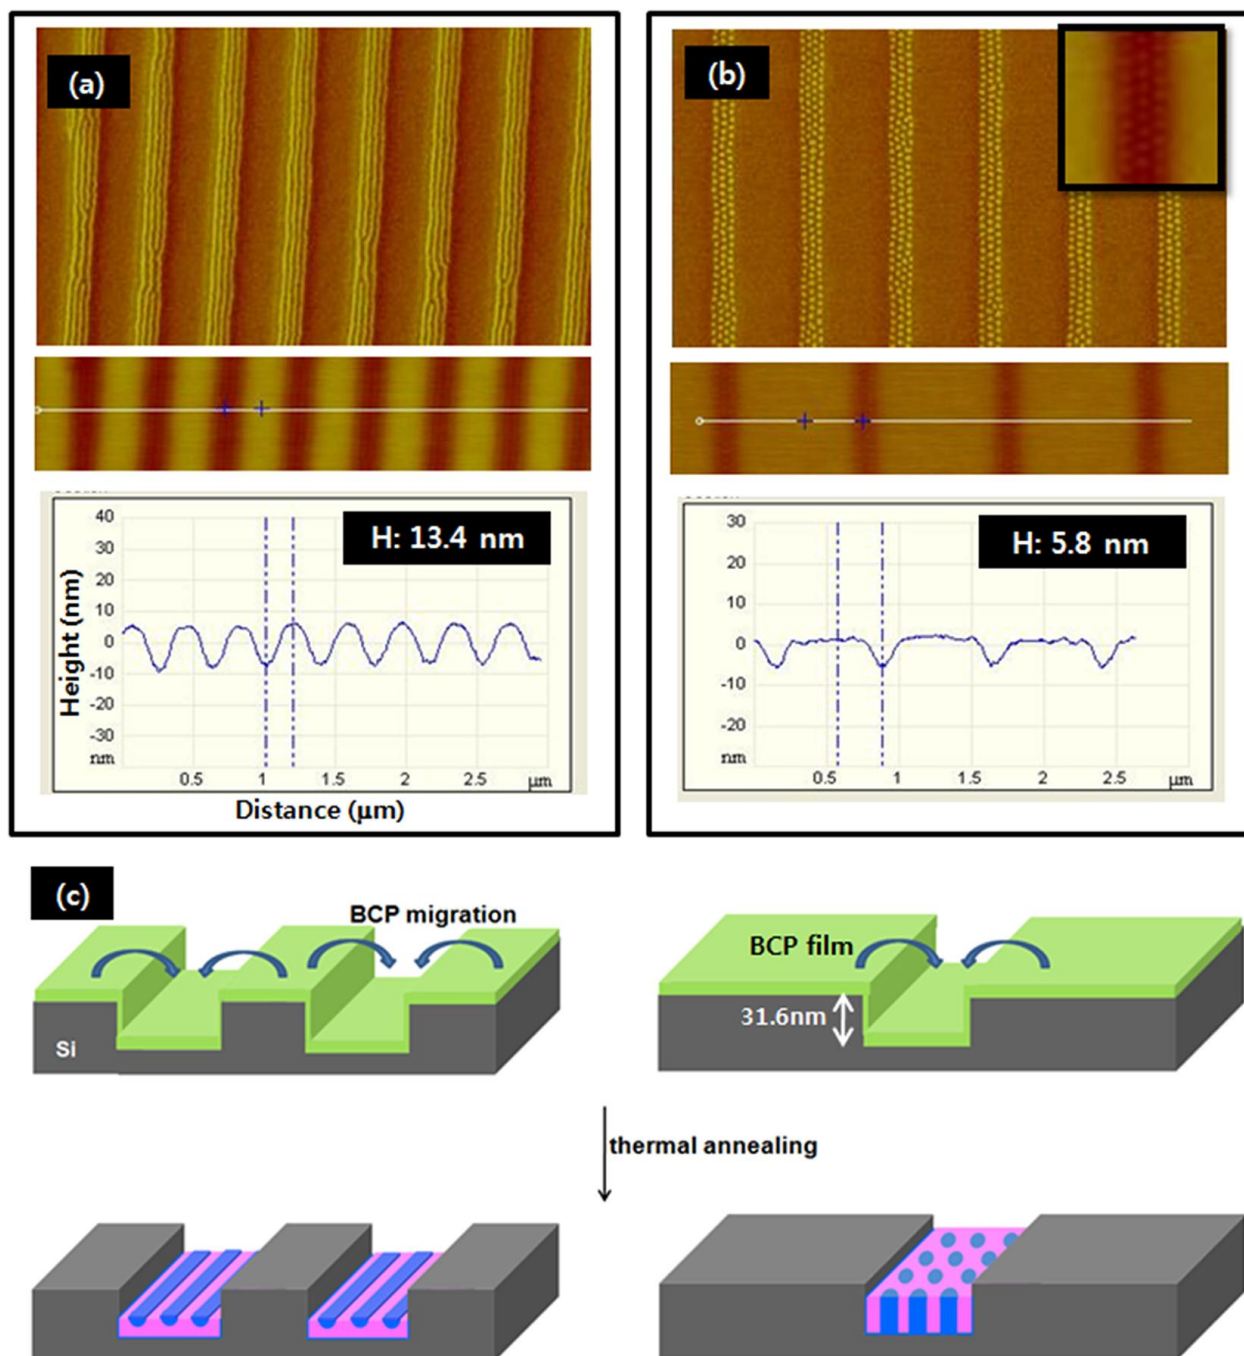

**Figure S3.** (a) Parallel orientation with  $H$ : 13.4 nm and 18.2 nm (calculated) film thickness, (b) perpendicularly oriented cylinders with  $H$ : 5.8 nm and 25.8 nm (calculated) thickness, and (c) scheme for parallel/vertical cylinder orientations. BCP film thickness measured by AFM (thickness = 31.6 –  $H$ : top-to-bottom distance).

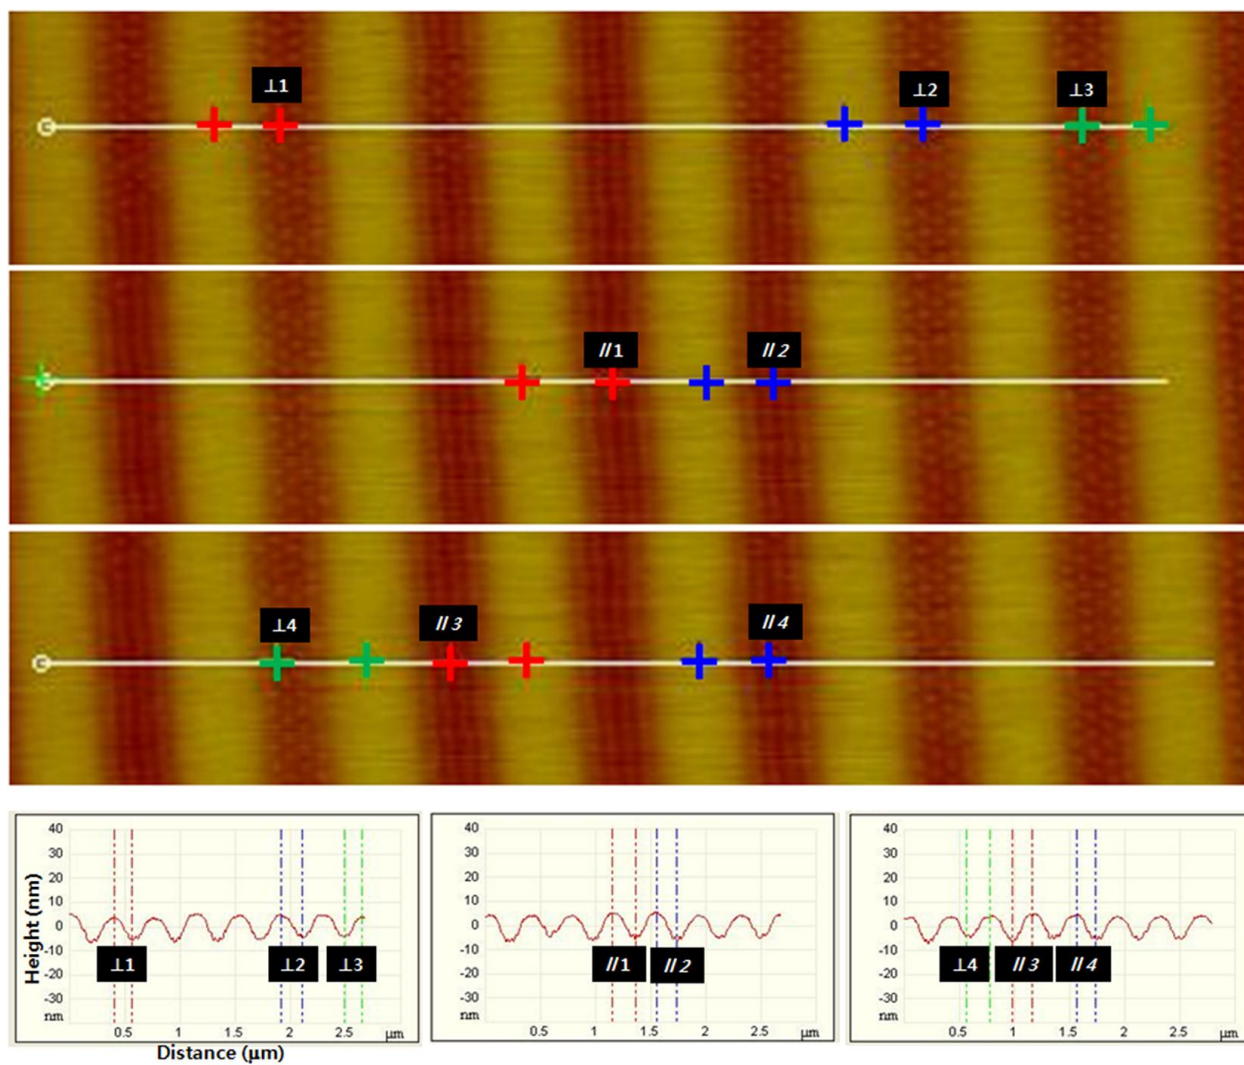

**Figure S4.** AFM height image showing the coexistence of parallel and vertical cylinder orientation originated by slight film thickness differences at screened area.

**Table S1.** Table lists the various BCP film thicknesses and their effect on cylinder orientation. The top-to-valley distances (H) for the 180 nm and 280 nm trench width were measured using AFM without subjecting the film to the one-block-removing etching process.

| Pattern Width (nm) | Trench height (nm) | From top to valley (H) (nm) | Film thickness in trench pattern (nm) | BCP orientation |
|--------------------|--------------------|-----------------------------|---------------------------------------|-----------------|
| 280                | 30.8               | 16.8                        | 14.0                                  | //              |
| 280                | 30.8               | 15.2                        | 15.6                                  | //              |
| 280                | 30.8               | 15.0                        | 15.8                                  | //              |
| 180                | 31.6               | 13.4                        | 18.2                                  | //              |
| 180                | 31.6               | 11.5                        | 20.1                                  | //              |
| 180                | 31.6               | 11.1                        | 20.5                                  | //              |
| 180                | 31.6               | 10.4                        | 21.2                                  | //              |
| 180                | 31.6               | 10.1                        | 21.5                                  | //              |
| 180                | 31.6               | 9.1                         | 22.5                                  | ⊥               |
| 180                | 31.6               | 8.9                         | 22.7                                  | ⊥               |
| 180                | 31.6               | 8.5                         | 23.1                                  | ⊥               |
| 180                | 31.6               | 8.0                         | 23.6                                  | ⊥               |
| 180                | 31.6               | 5.8                         | 25.8                                  | ⊥               |
| 280                | 30.8               | 4.4                         | 26.4                                  | ⊥               |
